# Supplementary material for: Grafting to Manage Infections of the Emerging Tomato Leaf Curl New Delhi Virus in Cucurbits
Source: MDPI journal article supplement (doi:10.3390/plants12010037), 2022-12-21
Supplement: s1 [file s1]

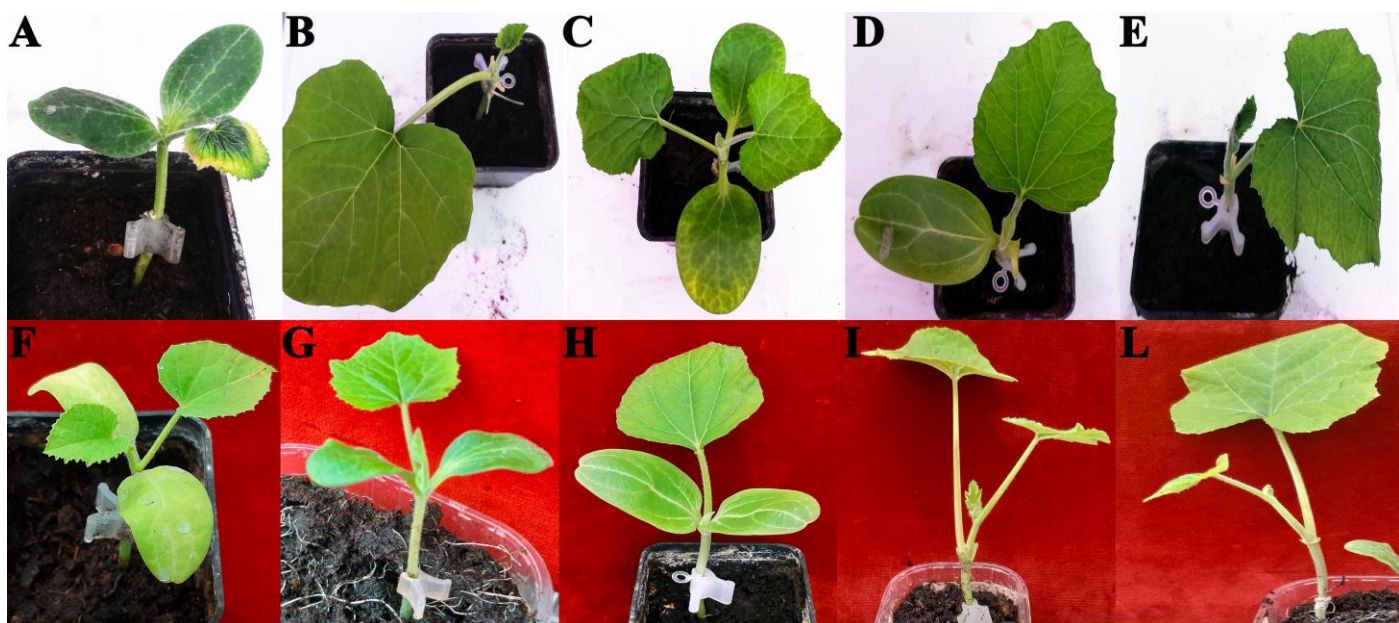

**Figure S2.** List of the different graft-combinations of susceptible and moderately susceptible cucurbit genotypes grafted on the tolerant *C. melo* cv. Barattiere used as common rootstock. Pictures taken one week after grafting: *C. pepo* cv. President (A); *C. moschata* cv. Moscata di Provenza (B); *C. pepo* cv. Howden (C); *C. pepo* cv. Scuro di Milano (D); *C. pepo* cv. Corritore (E); *C. melo* ecotype Retato (Cantalupo) (F); *C. moschata* cv. Cucuzza Genovese (G); *L. siceraria* spp. (H); *C. melo* cv. Retato standard (F1 hybrid) (I); *C. pepo* accession 6 (L).
