# Supplementary material for: Grafting to Manage Infections of the Emerging Tomato Leaf Curl New Delhi Virus in Cucurbits
Source: MDPI journal article supplement (doi:10.3390/plants12010037), 2022-12-21
Supplement: s1 [file s1]

**Table S1.** Incidence of systemic disease symptoms induced by ToLCNDV-Le in 10 plants for each genotype at 14 and 28 dpi.

| Plants                                            | Plants with Symptoms <sup>1</sup> |        | ToLCNDV-Le infection Category |
|---------------------------------------------------|-----------------------------------|--------|-------------------------------|
|                                                   | 14 dpi                            | 28 dpi |                               |
| <i>C. maxima</i> cv. Invernale rigata             | 0/10                              | 1/10   | TOLERANT                      |
| <i>C. pepo</i> accession 5                        | 0/10                              | 0/10   |                               |
| <i>C. melo</i> cv. Tendral verde                  | 0/10                              | 1/10   |                               |
| <i>C. melo</i> cv. Barattiere                     | 0/10                              | 1/10   |                               |
| <i>C. melo</i> ecotype Invernale variopinto       | 1/10                              | 0/10   |                               |
| <i>C. melo</i> ecotype Invernale giallo           | 1/10                              | 1/10   | MODERATELY TOLERANT           |
| <i>C. melo</i> ecotype Verde tondo                | 1/10                              | 1/10   |                               |
| <i>C. melo</i> ecotype Invernale a fasce          | 1/10                              | 1/10   |                               |
| <i>C. melo</i> ecotype Invernale bianco           | 1/10                              | 1/10   |                               |
| <i>C. melo</i> cv. Rugoso di Cosenza              | 2/10                              | 1/10   |                               |
| <i>C. melo</i> cv. Retato standard (no F1 hybrid) | 2/10                              | 3/10   | MODERATELY SUSCEPTIBLE        |
| <i>C. pepo</i> cv. President                      | 7/10                              | 10/10  |                               |
| <i>C. melo</i> ecotype Retato (Cantalupo)         | 6/10                              | 10/10  |                               |
| <i>C. pepo</i> accession 63                       | 8/10                              | 10/10  |                               |
| <i>C. moschata</i> cv. Moscata di Provenza        | 10/10                             | 10/10  |                               |
| <i>C. moschata</i> cv. Cucuzza Genovese           | 10/10                             | 10/10  | SUSCEPTIBLE                   |
| <i>C. pepo</i> cv. Howden                         | 10/10                             | 10/10  |                               |
| <i>C. pepo</i> cv. Scuro di Milano                | 10/10                             | 10/10  |                               |
| <i>L. siceraria</i> spp.                          | 10/10                             | 10/10  |                               |
| <i>C. melo</i> cv. Retato standard (F1 hybrid)    | 8/10                              | 10/10  |                               |
| <i>C. pepo</i> cv. Corritore                      | 8/10                              | 10/10  |                               |

<sup>1</sup> No. of symptomatic plants out of 10 plants rub-inoculated.
