# Supplementary material for: Grafting to Manage Infections of the Emerging Tomato Leaf Curl New Delhi Virus in Cucurbits
Source: MDPI journal article supplement (doi:10.3390/plants12010037), 2022-12-21
Supplement: s1 [file s1]

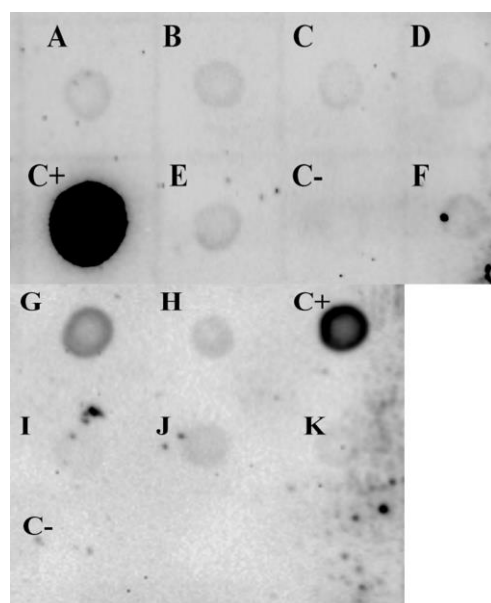

**Figure S1.** ToLCNDV-Le detection in moderately tolerant and tolerant cucurbit plants by Dot blot analysis from systemically infected leaves at 28 dpi: *C. melo* cv. Rugoso di Cosenza (**A**); *C. melo* cv. Retato standard (no F1 hybrid) (**B**); *C. melo* ecotype Invernale bianco (**C**); *C. melo* ecotype Invernale a fasce (**D**); *C. melo* ecotype Invernale giallo (**E**); *C. melo* ecotype Verde tondo (**F**); *C. maxima* cv. Invernale rigata (**G**); *C. pepo* accession 5; (**H**); *C. melo* cv. Tendral verde (**I**); *C. melo* cv. Barattiere (**J**); *C. melo* ecotype Invernale variopinto (**K**); C+ ToLCNDV PCR product served as positive control; C- Mock-inoculated plant served as negative control.
